# Supplementary material for: Drone-based assessment of multifunctionality in mixed cropping systems
Source: Research Square preprint supplement (doi:10.21203/rs.3.rs-7530883/v1), 2025-09-18
Supplement: Supplementary file 1 [file 670cfadad97a5de98ef67cc5.docx]

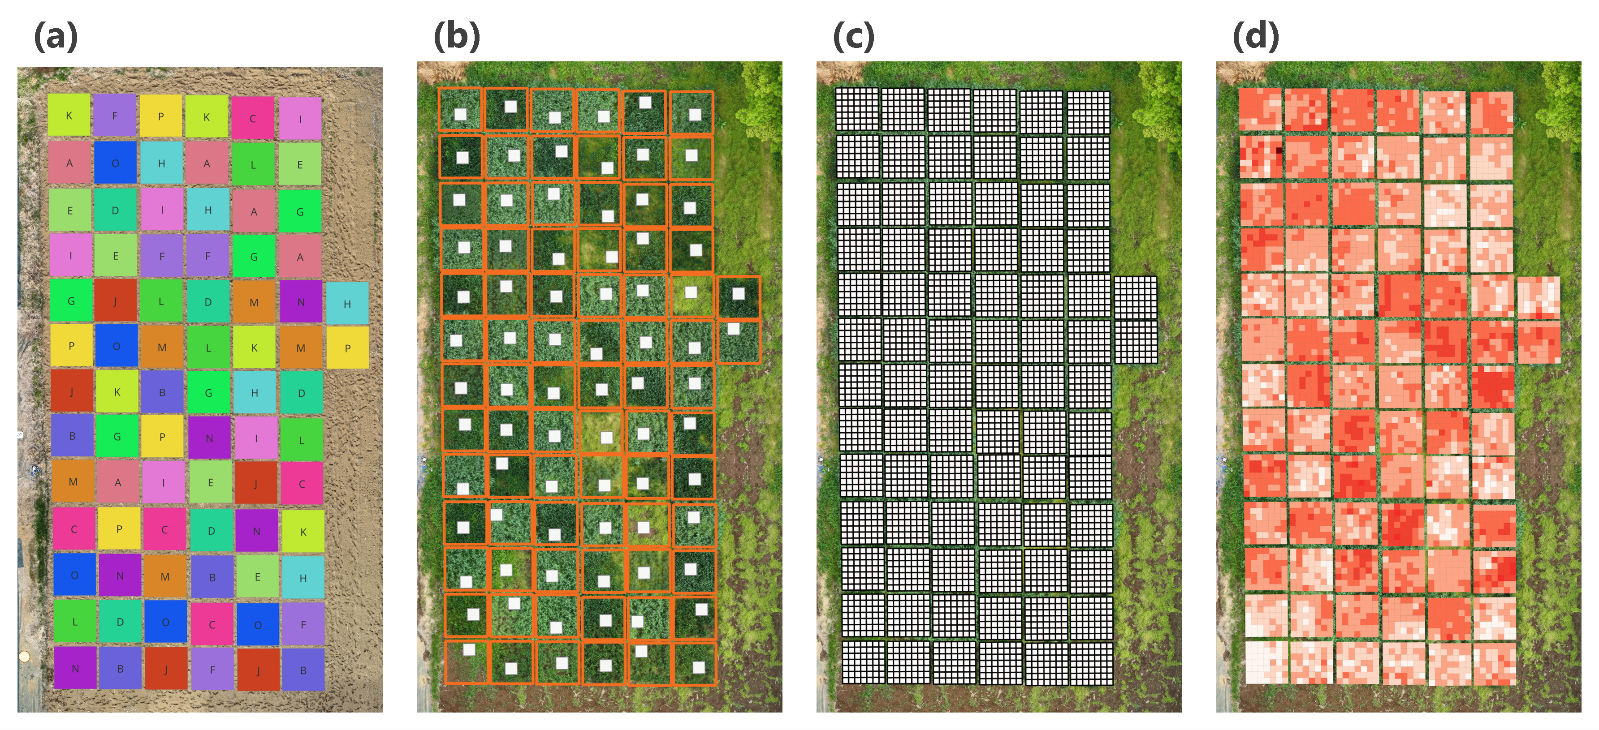
Supplementary figure 1. Prediction of biomass production using the GAUSS approach. (a) Field layout and seed combinations: A (o1), B (o2), C (o3), D (r), E (b), F (o1 + o2), G (o2 + o3), H (o1 + o3), I (r + b), J (o1 + b), K (o1 + r), L (o1 + o2 + o3), M (o1 + r + b), N (no seeding), O (o2 + r + b), P (o3 + r + b). Oats: o1 = ‘Tochiyutaka’, o2 = ‘Suwan’, o3 = ‘Hittoman’; rye: r = ‘Raitoru’; barley: b = ‘Musashibou’. (b) Manual sampling with geolocation. Orange borders indicate individual plots; white squares represent 1 m × 1 m sampling points. (c) Grid segmentation of each plot. (d) Predicted biomass production in each cell.


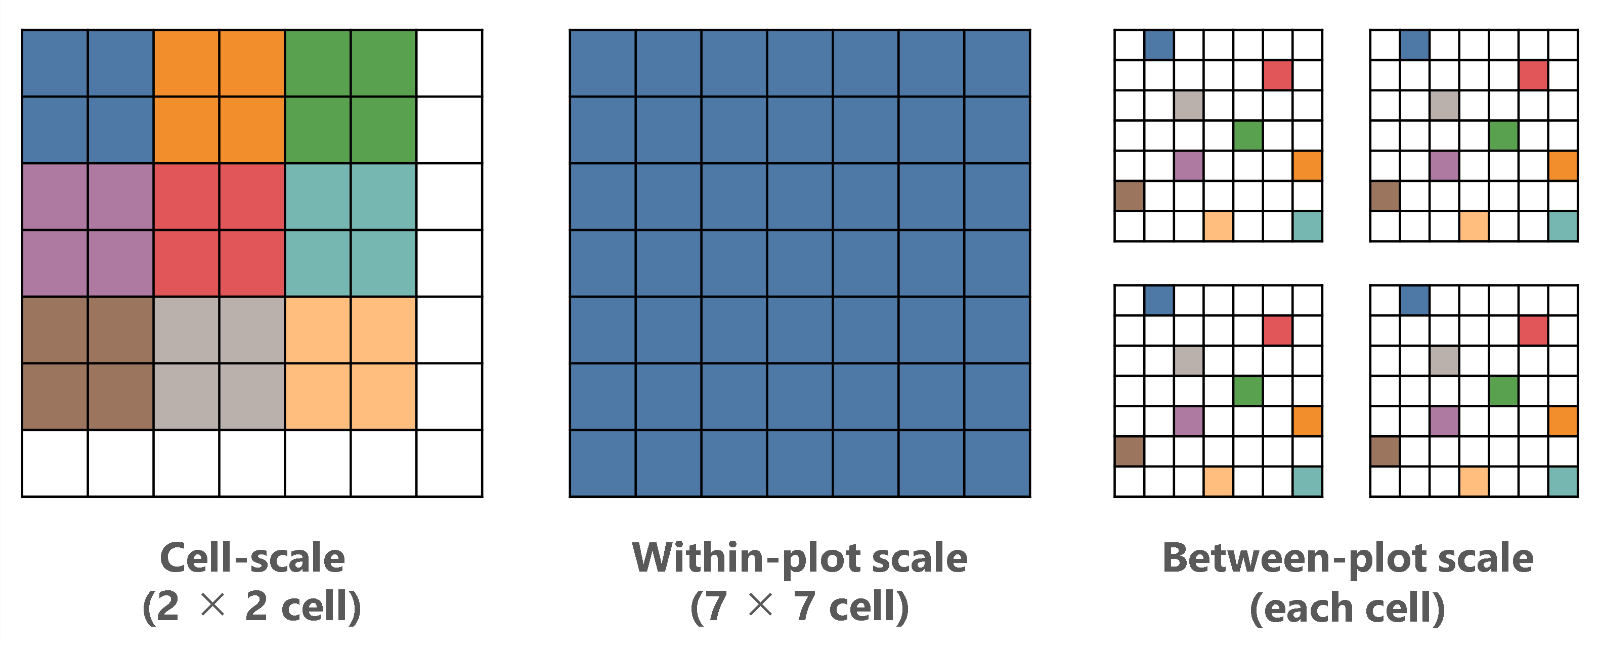
Supplementary figure 2. Spatial scales of biomass variability: cell-scale (2 × 2 cell), within-plot (7 × 7 cell), and between-plot (same-position cells across plots under same cropping systems).


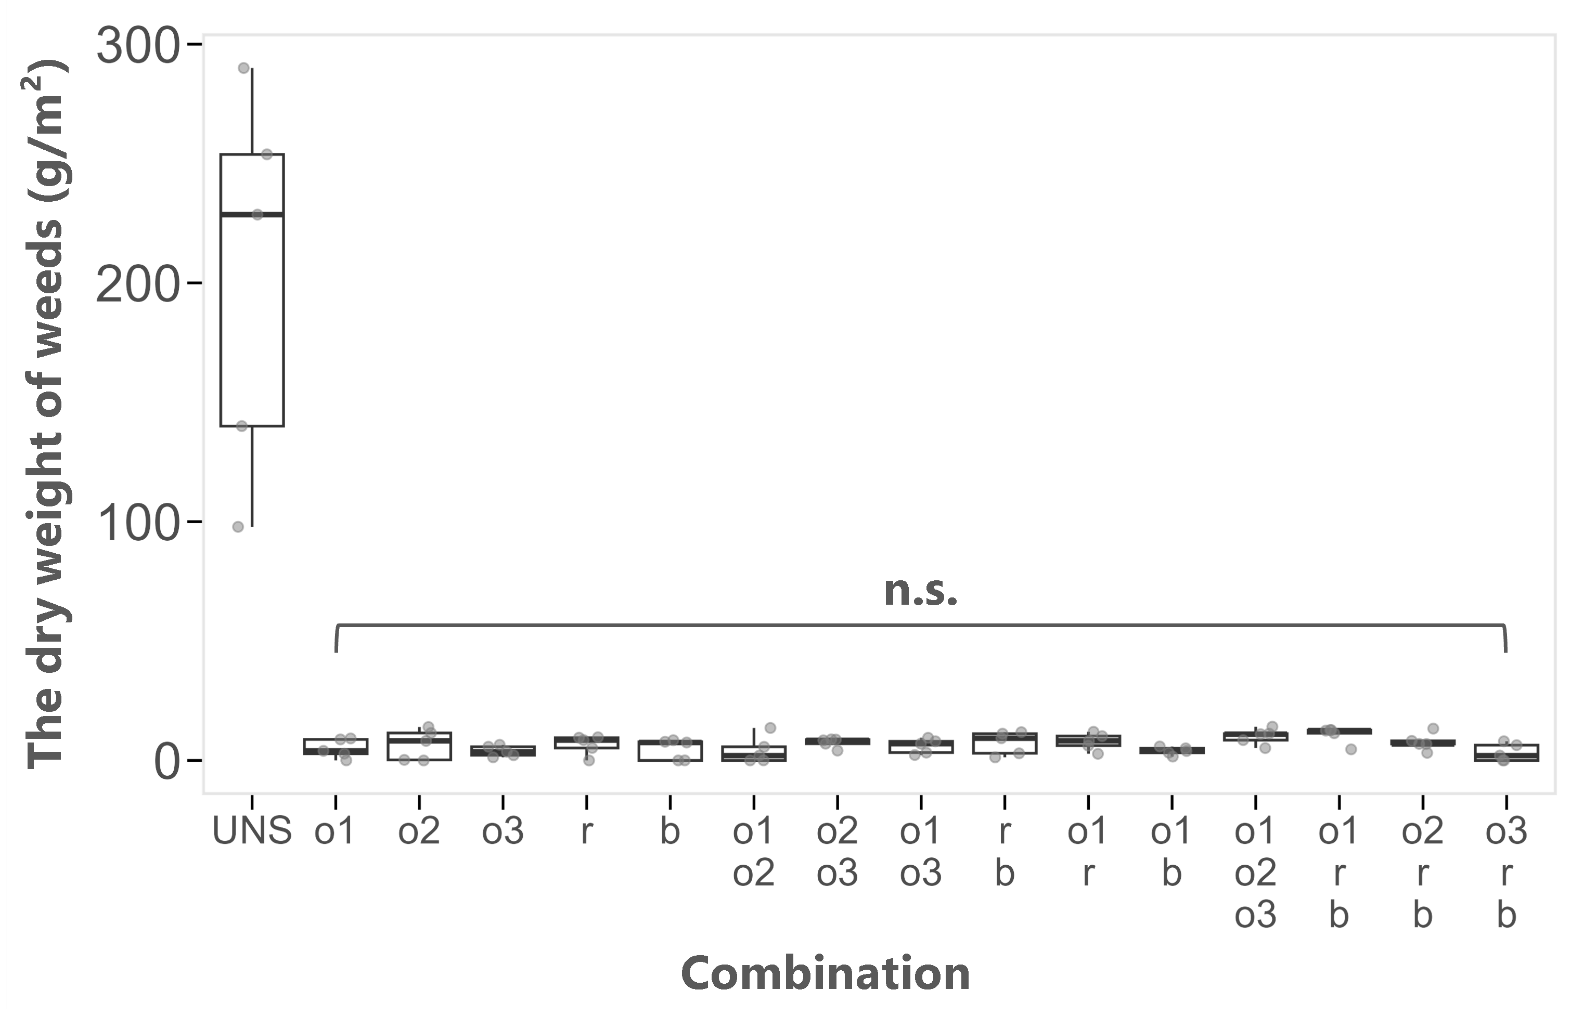
Supplementary figure 3. The Weed dry weight for each seed combination. The analysis was conducted to confirm that the influence of weeds on the experimental results was negligible. We analysed weed dry weight using the generalised linear mixed model with cropping treatments as the fixed effect and the row and column positions of the plots as random effects. To assess the differences among the cropping treatments, pairwise comparisons were performed on the 15 seeded treatments using Tukey's method applied to this model. No significant differences were found between any pair of treatments (p > 0.05 for all comparisons). (Note: UNS represents unseeded; o1, o2, and o3 represent oat varieties; r represents rye; b represents barley. The unseeded treatment was not used in the analysis on multifunctionality.)


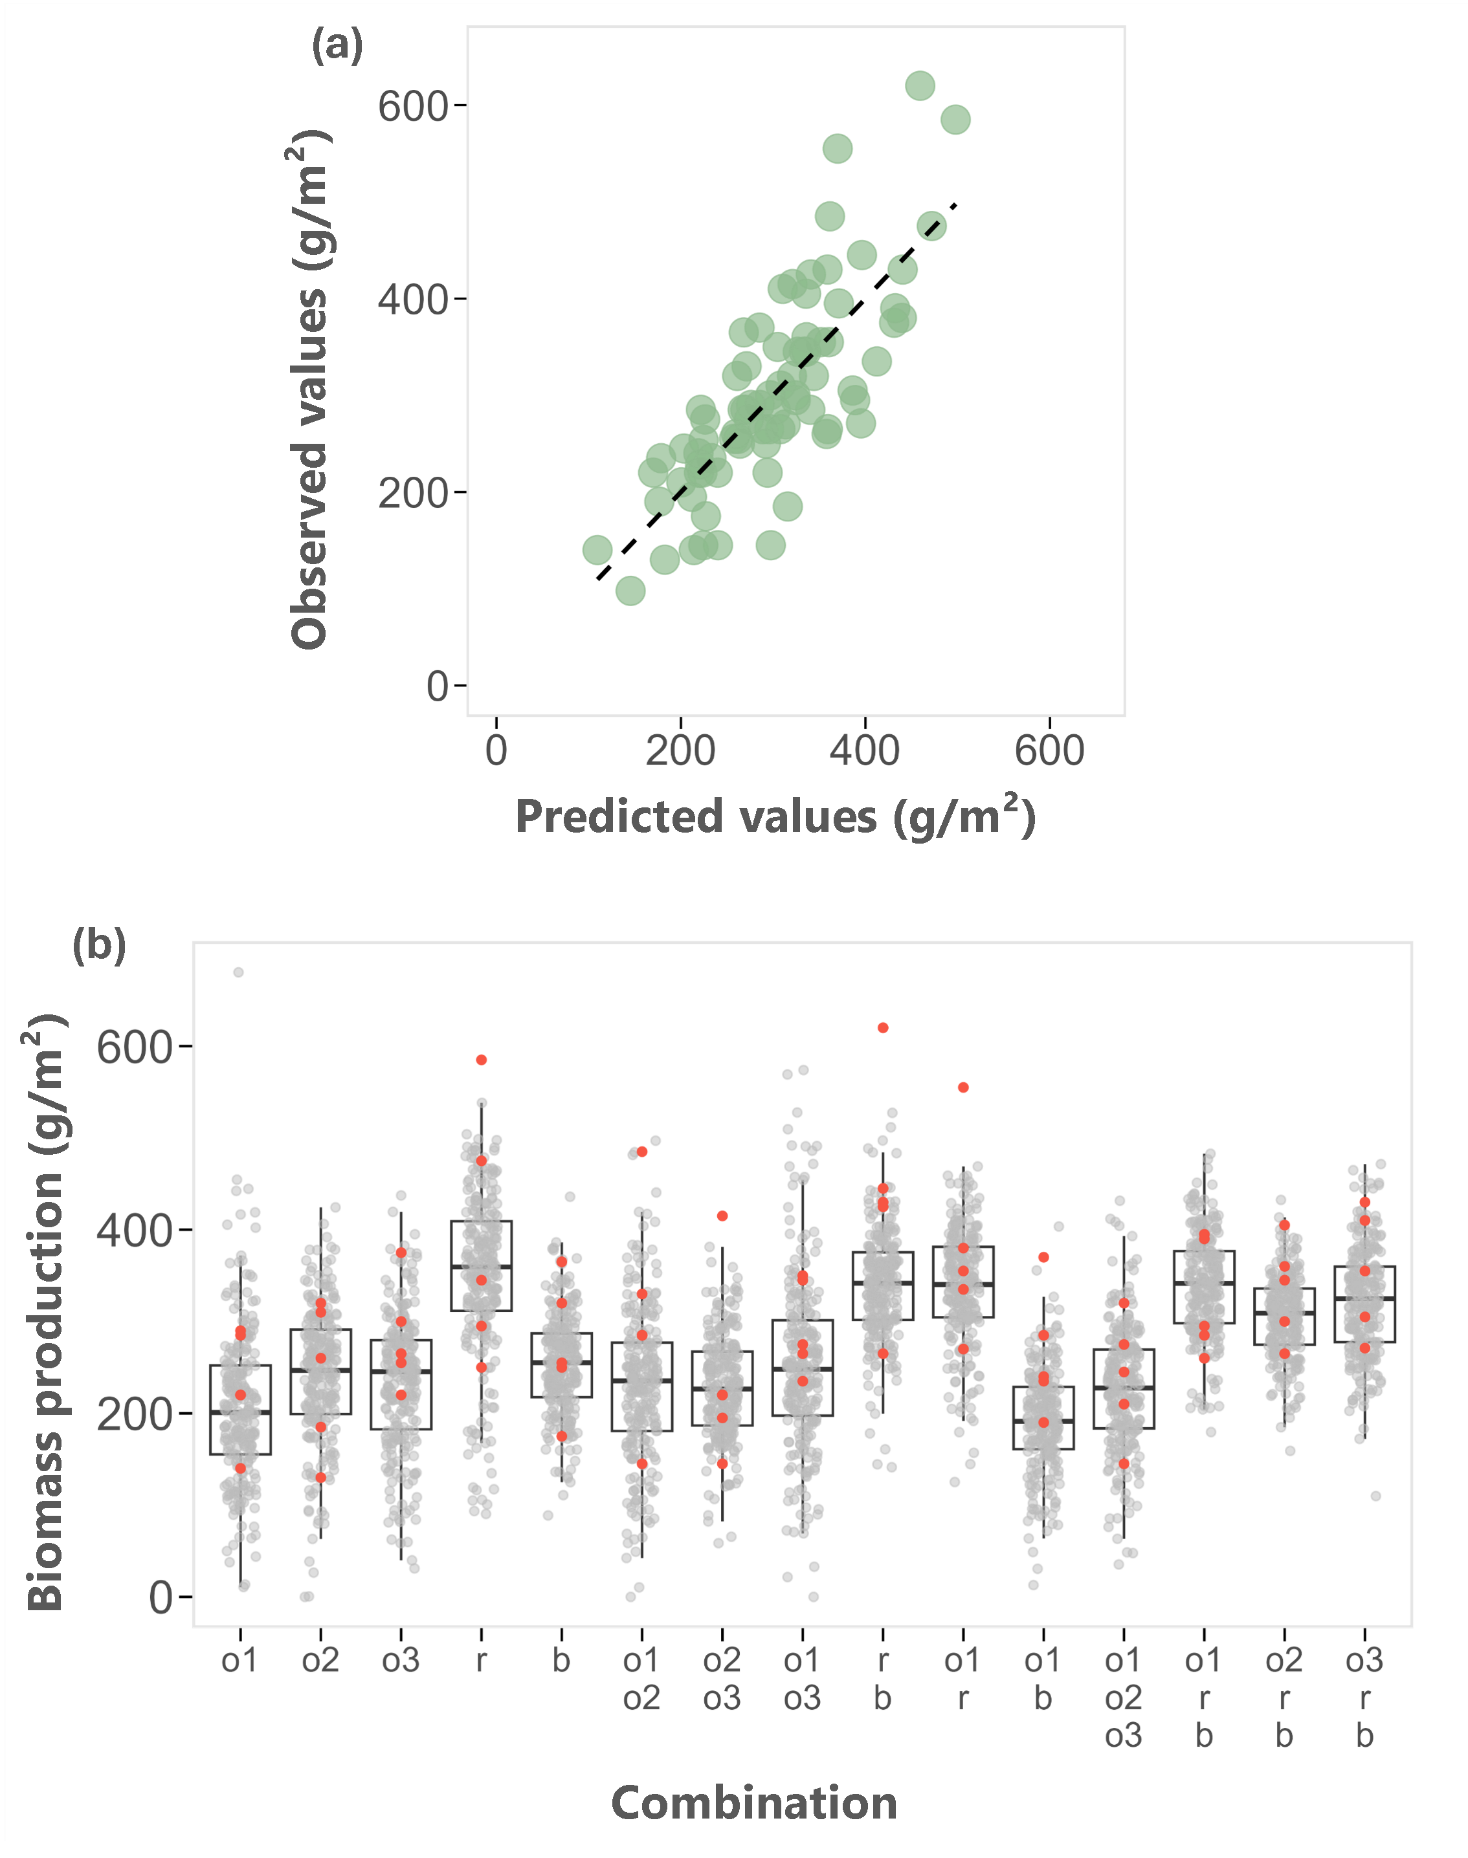
Supplementary figure 4. Relationships between predicted and observed biomass production values. (a) Predicted values vs observed values. R² indicates the coefficient of determination. (b) Distribution of predicted biomass values for each seed combination, with manually sampled biomass values indicated by red points. (Note: o1, o2 and o3 represent oat varieties; r represents rye; b represents barley.)

Supplementary table . Monthly average air temperature and total rainfall.

| Month | Average temperature (℃) | Rainfall monthly (mm) |
| --- | --- | --- |
| December | 10.2 | 27.5 |
| January | 7.9 | 38.0 |
| February | 8.3 | 59.5 |
| March | 10.1 | 154.0 |
| April | 17.0 | 103.0 |
| May | 20.1 | 230.5 |

Supplementary table . Information about the seeds used in the experiment.

|  | Species | Cultivar | Seed company | Purpose |
| --- | --- | --- | --- | --- |
| o1 | Oat (Avena sativa) | Tochiyutaka | Snow Brand Seed Co., Japan | Cover crop |
| o2 | Oat (Avena sativa) | Suwan | Snow Brand Seed Co., Japan | Cover crop |
| o3 | Oat (Avena sativa) | Hittoman | Kaneko Seeds Co., Japan | Cover crop, Forage crop |
| r | Rye (Secale cereale) | Raito-ru | Takii & Co., Ltd., Japan | Cover crop |
| b | Barley (Hordeum vulgare) | Musashibou | Snow Brand Seed Co., Japan | Forage crop |

**Supplementary table 3.** Summary of seed combinations, cropping systems, seeding rate, and replications.o1, o2 and o3 refer to the oat cultivars ‘Tochiyutaka’, ‘Suwan’, and ‘Hittoman’, respectively. r = rye; b = barley. mono = monoculture; intra.2 = two-variety intraspecific mixed cropping; inter.2 = two-species interspecific mixed cropping; intra.3 = three-variety intraspecific mixed cropping; inter.3 = three-species interspecific mixed cropping.

| **Combination** | **Cropping system** | **Seeding rate (kg/ha)** | **Replications** |
| --- | --- | --- | --- |
| o1 | mono | 90 | 5 |
| o2 | mono | 90 | 5 |
| o3 | mono | 90 | 5 |
| r | mono | 90 | 5 |
| b | mono | 90 | 5 |
| o1, o2 | intra.2 | 90 | 5 |
| o2, o3 | intra.2 | 90 | 5 |
| o1, o3 | intra.2 | 90 | 5 |
| r, b | inter.2 | 90 | 5 |
| o1, b | inter.2 | 90 | 5 |
| o1, r | inter.2 | 90 | 5 |
| o1, o2, o3 | intra.3 | 90 | 5 |
| o1, r, b | inter.3 | 90 | 5 |
| o2, r, b | inter.3 | 90 | 5 |
| o3, r, b | inter.3 | 90 | 5 |
| Unseeded | NA | NA | 5 |

Supplementary table 4. The results of the likelibood ratio tests for the models. aCV represents adjusted coefficient of variation. mono = monoculture; intra.2 = two-variety intraspecific mixed cropping; inter.2 = two-species interspecific mixed cropping; intra.3 = three-variety intraspecific mixed cropping; inter.3 = three-species interspecific mixed cropping. mono_highest refers to the highest-yielding oat variety (‘Suwan’) or species (rye) under monoculture. intra_highest indicates the combination of the highest-yielding oats (‘Tochiyutaka’ and ‘Suwan’) in intraspecific mixtures. inter_highest denotes the highest-yielding combination (barley and rye) in interspecific mixtures.

| Response variable | Explanatory variable | Chisq (χ²) | DF | P-value |
| --- | --- | --- | --- | --- |
| Biomass production | mono vs intra.2 vs intra.3 | 12.075 | 2 | 0.002 |
|  | mono vs inter.2 vs inter.3 | 13.365 | 2 | 0.001 |
|  | mono_highest vs intra_highest | 0.401 | 1 | 0.526 |
|  | mono_highest vs inter_highest | 2.833 | 1 | 0.092 |
| aCV (2 × 2 cell) | mono vs intra.2 vs intra.3 | 9.066 | 2 | 0.011 |
|  | mono vs inter.2 vs inter.3 | 5.605 | 2 | 0.061 |
|  | mono_highest vs intra_highest | 0.000 | 1 | 0.987 |
|  | mono_highest vs inter_highest | 3.275 | 1 | 0.070 |
| aCV (within-plot) | mono vs intra.2 vs intra.3 | 9.792 | 2 | 0.007 |
|  | mono vs inter.2 vs inter.3 | 0.528 | 2 | 0.768 |
|  | mono_highest vs intra_highest | 0.066 | 1 | 0.798 |
|  | mono_highest vs inter_highest | 1.097 | 1 | 0.295 |
| aCV (between-plot) | mono vs intra.2 vs intra.3 | 14.589 | 2 | < 0.001 |
|  | mono vs inter.2 vs inter.3 | 18.968 | 2 | < 0.001 |
|  | mono_highest vs intra_highest | 2.884 | 1 | 0.089 |
|  | mono_highest vs inter_highest | 30.346 | 1 | < 0.001 |
| Lodging resistance | mono vs inter.2 vs inter.3 | 15.852 | 2 | < 0.001 |
|  | mono_highest vs inter_highest | 20.739 | 1 | < 0.001 |
| Lodging resilience | mono vs inter.2 vs inter.3 | 8.0413 | 2 | 0.018 |
|  | mono_highest vs inter_highest | 2.099 | 1 | 0.147 |
| Early canopy closure | mono vs intra.2 vs intra.3 | 12.220 | 2 | 0.002 |
|  | mono vs inter.2 vs inter.3 | 37.178 | 2 | < 0.001 |
|  | mono_highest vs intra_highest | 2.019 | 1 | 0.155 |
|  | mono_highest vs inter_highest | 6.210 | 1 | 0.013 |

Supplementary table . The results of Tukey’s post hoc tests. aCV represents adjusted coefficient of variation. mono = monoculture; intra.2 = two-variety intraspecific mixed cropping; inter.2 = two-species interspecific mixed cropping; intra.3 = three-variety intraspecific mixed cropping; inter.3 = three-species interspecific mixed cropping. mono_highest refers to the highest-yielding oat variety (‘Suwan’) or species (rye) under monoculture. intra_highest indicates the combination of the highest-yielding oats (‘Tochiyutaka’ and ‘Suwan’) in intraspecific mixtures. inter_highest denotes the highest-yielding combination (barley and rye) in interspecific mixtures.

| Response variable | Contrast | Estimate | SE | DF | t-value/z-value | P-value |
| --- | --- | --- | --- | --- | --- | --- |
| Biomass production | mono vs intra.2 | -14.280 | 4.350 | 1701 | -3.284 | 0.003 |
|  | mono vs intra.3 | -0.323 | 6.820 | 1503 | -0.047 | 0.999 |
|  | intra.2 vs intra.3 | 13.957 | 6.800 | 1449 | 2.053 | 0.100 |
|  | mono vs inter.2 | -7.590 | 6.880 | 1124 | -1.104 | 0.512 |
|  | mono vs inter.3 | -31.840 | 9.110 | 1440 | -3.494 | 0.001 |
|  | inter.2 vs inter.3 | -24.240 | 7.870 | 1676 | -3.082 | 0.006 |
|  | mono_highest vs intra_highest | 13.100 | 26.000 | 6.64 | 0.505 | 0.630 |
|  | mono_highest vs inter_highest | 19.400 | 67.900 | 0.01 | 0.285 | 0.985 |
| aCV (2 × 2 cell) | mono vs intra.2 | -0.045 | 0.065 | Inf | -0.689 | 0.770 |
|  | mono vs intra.3 | 0.249 | 0.098 | Inf | 2.552 | 0.029 |
|  | intra.2 vs intra.3 | 0.294 | 0.098 | Inf | 2.989 | 0.008 |
|  | mono vs inter.2 | 0.190 | 0.087 | Inf | 2.189 | 0.073 |
|  | mono vs inter.3 | 0.038 | 0.122 | Inf | 0.314 | 0.947 |
|  | inter.2 vs inter.3 | -0.152 | 0.109 | Inf | -1.395 | 0.344 |
|  | mono_highest vs intra_highest | -0.002 | 0.013 | Inf | -0.017 | 0.987 |
|  | mono_highest vs inter_highest | 0.318 | 0.176 | Inf | 1.810 | 0.070 |
| aCV (within-plot) | mono vs intra.2 | -0.085 | 0.073 | Inf | -1.164 | 0.475 |
|  | mono vs intra.3 | 0.279 | 0.114 | Inf | 2.439 | 0.039 |
|  | intra.2 vs intra.3 | 0.363 | 0.116 | Inf | 3.127 | 0.005 |
|  | mono vs inter.2 | 0.061 | 0.102 | Inf | 0.602 | 0.819 |
|  | mono vs inter.3 | -0.014 | 0.147 | Inf | -0.096 | 0.995 |
|  | inter.2 vs inter.3 | -0.075 | 0.137 | Inf | -0.551 | 0.846 |
|  | mono_highest vs intra_highest | -0.036 | 0.140 | 8 | -0.256 | 0.804 |
|  | mono_highest vs inter_highest | 0.174 | 0.166 | 8 | 1.048 | 0.325 |
| aCV (between-plot) | mono vs intra.2 | 0.008 | 0.050 | 144 | 0.154 | 0.987 |
|  | mono vs intra.3 | 0.172 | 0.050 | 144 | 3.414 | 0.002 |
|  | intra.2 vs intra.3 | 0.164 | 0.050 | 144 | 3.261 | 0.004 |
|  | mono vs inter.2 | -0.090 | 0.052 | 144 | -1.708 | 0.206 |
|  | mono vs inter.3 | 0.138 | 0.052 | 144 | 2.634 | 0.025 |
|  | inter.2 vs inter.3 | 0.228 | 0.052 | 144 | 4.342 | < 0.001 |
|  | mono_highest vs intra_highest | -0.143 | 0.084 | 96 | -1.699 | 0.093 |
|  | mono_highest vs inter_highest | 0.451 | 0.082 | 96 | 5.532 | < 0.001 |
| Lodging resistance | mono vs inter.2 | -0.922 | 0.233 | Inf | -3.955 | < 0.001 |
|  | mono vs inter.3 | -0.893 | 0.323 | Inf | -2.765 | 0.016 |
|  | inter.2 vs inter.3 | 0.030 | 0.259 | Inf | 0.112 | 0.993 |
|  | mono_highest vs inter_highest | 2.080 | 0.456 | Inf | 4.554 | < 0.001 |
|  | mono_highest vs inter_highest | 0.169 | 0.460 | Inf | 0.368 | 0.713 |
| Lodging resilience | mono vs inter.2 | -0.985 | 0.375 | Inf | -2.626 | 0.024 |
|  | mono vs inter.3 | -0.551 | 0.447 | Inf | -1.233 | 0.434 |
|  | inter.2 vs inter.3 | 0.435 | 0.314 | Inf | 1.385 | 0.349 |
|  | mono_highest vs inter_highest | -0.635 | 0.491 | Inf | -1.293 | 0.196 |
| Early canopy closure | mono vs intra.2 | 0.015 | 0.006 | Inf | 2.481 | 0.035 |
|  | mono vs intra.3 | 0.031 | 0.010 | Inf | 3.130 | 0.005 |
|  | intra.2 vs intra.3 | 0.016 | 0.010 | Inf | 1.582 | 0.253 |
|  | mono vs inter.2 | 0.062 | 0.103 | Inf | 4.883 | < 0.001 |
|  | mono vs inter.3 | 0.097 | 0.017 | Inf | 5.719 | < 0.001 |
|  | inter.2 vs inter.3 | 0.034 | 0.015 | Inf | 2.338 | 0.051 |
|  | mono_highest vs intra_highest | -0.031 | 0.023 | Inf | -1.379 | 0.168 |
|  | mono_highest vs inter_highest | -0.057 | 0.023 | Inf | -2.492 | 0.013 |

Supplementary table 6. The results of the likelihood ratio test for the diversity-interaction (DI) modeling. The diversity–interaction modeling approach Kirwan et al. (2009), which allows the partitioning of mixture performance into identity and interaction effects among components. o1, o2 and o3 refer to the oat cultivars ‘Tochiyutaka’, ‘Suwan’, and ‘Hittoman’, respectively. r = rye; b = barley.

| Explanatory variable | Chisq (χ²) | DF | P-value |
| --- | --- | --- | --- |
| o1 | 1767.80 | 1 | < 0.001 |
| o2 | 2372.85 | 1 | < 0.001 |
| o3 | 2236.48 | 1 | < 0.001 |
| o1:o2 | 0.11 | 1 | 0.735 |
| o1:o3 | 21.89 | 1 | < 0.001 |
| o2:o3 | 6.71 | 1 | 0.010 |
| o | 2163.40 | 1 | < 0.001 |
| r | 6157.20 | 1 | < 0.001 |
| b | 3229.70 | 1 | < 0.001 |
| o:r | 206.10 | 1 | < 0.001 |
| o:b | 21.60 | 1 | < 0.001 |
| r:b | 107.20 | 1 | < 0.001 |

Supplementary table 7. The summary of the diversity-interaction (DI) modeling. The diversity–interaction modeling approach Kirwan et al. (2009), which allows the partitioning of mixture performance into identity and interaction effects among components. o1, o2 and o3 refer to the oat cultivars ‘Tochiyutaka’, ‘Suwan’, and ‘Hittoman’, respectively. r = rye; b = barley.

| Explanatory variable | Estimate | SE | t-value | P-value |
| --- | --- | --- | --- | --- |
| o1 | 209.308 | 4.978 | 42.045 | < 0.001 |
| o2 | 242.496 | 4.978 | 48.712 | < 0.001 |
| o3 | 235.424 | 4.978 | 47.291 | < 0.001 |
| o1:o2 | 7.732 | 22.883 | 0.338 | 0.735 |
| o1:o3 | 107.070 | 22.883 | 4.679 | < 0.001 |
| o2:o3 | -59.276 | 22.883 | -2.590 | 0.010 |
| o | 205.420 | 4.416 | 46.512 | < 0.001 |
| r | 346.550 | 4.416 | 78.468 | < 0.001 |
| b | 250.990 | 4.416 | 56.831 | < 0.001 |
| o:r | 291.434 | 20.301 | 14.355 | < 0.001 |
| o:b | -94.332 | 20.301 | -4.647 | < 0.001 |
| r:b | 210.150 | 20.301 | 10.352 | < 0.001 |

Reference

Kirwan, L., Connolly, J., Finn, J. A., Brophy, C., Lüscher, A., Nyfeler, D., & Sebastiå, M. T. (2009). Diversity-interaction modeling: Estimating contributions of species identities and interactions to ecosystem function. *Ecology*, *90*(8), 2032–2038. https://doi.org/10.1890/08-1684.1
